# Supplementary material
Source: Frontiers journal article supplement (https://www.frontiersin.org/articles/405878)
Supplement: Data_Sheet_1.PDF [file Data_Sheet_1.PDF]

**Supplemental Table 1. Histopathological Scoring System for Mouse Lungs**

|                                                             |                 |
|-------------------------------------------------------------|-----------------|
| <b><u>Score 1)</u></b>                                      |                 |
| <b>Airways Inflammation</b>                                 | <b>Score /5</b> |
| 0 = Lack of inflammatory cells around airways - Absent      |                 |
| 1 = Some airways have small numbers of cells - Mild         |                 |
| 2 = Some airways have significant inflammation. - Moderate  |                 |
| 3 = Majority of airways have some inflammation. - Marked    |                 |
| 4 = Majority of airways are significantly inflamed - Severe |                 |
| 5 = All of airways are completely inflamed. – Whole         |                 |
| <b><u>Score 2)</u></b>                                      |                 |
| <b>Vascular Inflammation</b>                                | <b>Score /5</b> |
| 0 = Lack of inflammatory cells around vessels. - Absent     |                 |
| 1 = Some vessels have small numbers of cells. - Mild        |                 |
| 2 = Some vessels have significant inflammation. - Moderate  |                 |
| 3 = Majority of vessels have some inflammation. - Marked    |                 |
| 4 = Majority of vessels are significantly inflamed - Severe |                 |
| 5 = All of vessels are completely inflamed. - Whole         |                 |
| <b><u>Score 3)</u></b>                                      |                 |
| <b>Parenchymal Inflammation (at 10X magnification)</b>      | <b>Score /5</b> |
| 0 = <1% affected                                            |                 |
| 1 = 1-9% affected                                           |                 |
| 2 = 10-29% affected                                         |                 |
| 3 = 30-49% affected                                         |                 |
| 4 = 50-69% affected                                         |                 |
| 5 = >70% affected                                           |                 |
